# Supplementary material for: Zooplankton as the primary diet for cold-water scleractinian corals (CWCs): implications for the CWC marine N cycle proxy and trophic ecology
Source: Copernicus journal article supplement (doi:10.5194/bg-2023-127), 2023-08-21
Supplement: Supplementary file 1 [file bg-2023-127-supplement.pdf]

## 1 Supplementary Materials – Mottram

2

3 **Table S1.** Sample types, collection dates, and collection location.

4

| Date       | Station Name  | Lat (°N) | Lon (°W) | Tissue | Skeleton | Nitrate | SPOM | Net Tow |
|------------|---------------|----------|----------|--------|----------|---------|------|---------|
| Sept. 2020 | PC            | 48.588   | -122.937 |        |          | X       |      |         |
| Sept. 2020 | FHL Dock      | 48.545   | -123.012 |        |          |         |      | X       |
| Sept. 2020 | Point Caution | 48.563   | -123.014 | X      | X        |         |      |         |
| April 2021 | Shady Cove    | 48.547   | -123.007 | X      |          | X       | X    |         |
| Nov. 2020  | Bell Island   | 48.596   | -122.981 | X      | X        | X       |      |         |
| Aug 2021   | Station 1     | 48.553   | -123.006 |        |          | X       | X    | X       |
| Aug 2021   | Station 2     | 48.546   | -123.007 |        |          | X       | X    | X       |
| Aug 2021   | Station 3     | 48.562   | -123.014 |        |          | X       | X    | X       |
| Aug 2021   | Station 4     | 48.549   | -123.005 |        |          | X       | X    | X       |

5

6 **Table S2.** Provenance of experimental *Artemia* groups for assigned colors, corresponding  $\delta^{15}\text{N}$ , total number  
7 of coral samples in each experimental group.

8

| Experimental group | <i>Artemia</i> ID | Location               | Average $\delta^{15}\text{N}$ (‰) | $\pm \sigma$ (‰) | Number of coral samples |
|--------------------|-------------------|------------------------|-----------------------------------|------------------|-------------------------|
| Green              | GSL               | Great Salt Lake        | 17.0                              | 0.3              | 18                      |
| Yellow             | 1816              | Lake Ulzhay,<br>Russia | 13.8                              | 0.4              | 12                      |
| Orange             | 1805              | Vinh Chau,<br>Vietnam  | 9.9                               | 0.3              | 12                      |
| Pink               | 1808              | Tibet                  | 6.3                               | 0.2              | 12                      |

9

10

11

12 **Table S3.** Relative carbon and nitrogen content of the experimental *Artemia* strains and corresponding  $\delta^{13}\text{C}$   
13 and  $\delta^{15}\text{N}$  (standard error =  $\pm 0.3$  ‰)

14

| <i>Artemia</i> Strain |         | % C  | $\delta^{13}\text{C}$ (‰) | % N  | $\delta^{15}\text{N}$ (‰) | Molar C/N ratio |
|-----------------------|---------|------|---------------------------|------|---------------------------|-----------------|
| GSL                   | Cysts   | 51.7 | -19.1                     | 9.1  | 16.6                      | 6.7             |
|                       | Nauplii | 49.1 | -18.9                     | 9.6  | 16.9                      | 6.0             |
| 1816                  | Cysts   | 49.5 | -20.1                     | 9.5  | 13.4                      | 6.5             |
|                       | Nauplii | 44.0 | -19.1                     | 7.6  | 14.1                      | 5.1             |
| 1805                  | Cysts   | 51.9 | -20.0                     | 9.4  | 9.9                       | 6.5             |
|                       | Nauplii | 42.9 | -19.2                     | 10.3 | 9.9                       | 4.8             |
| 1808                  | Cysts   | 57.5 | -21.3                     | 11.1 | 6.1                       | 6.1             |
|                       | Nauplii | 50.6 | -21.8                     | 9.7  | 6.4                       | 6.1             |

15

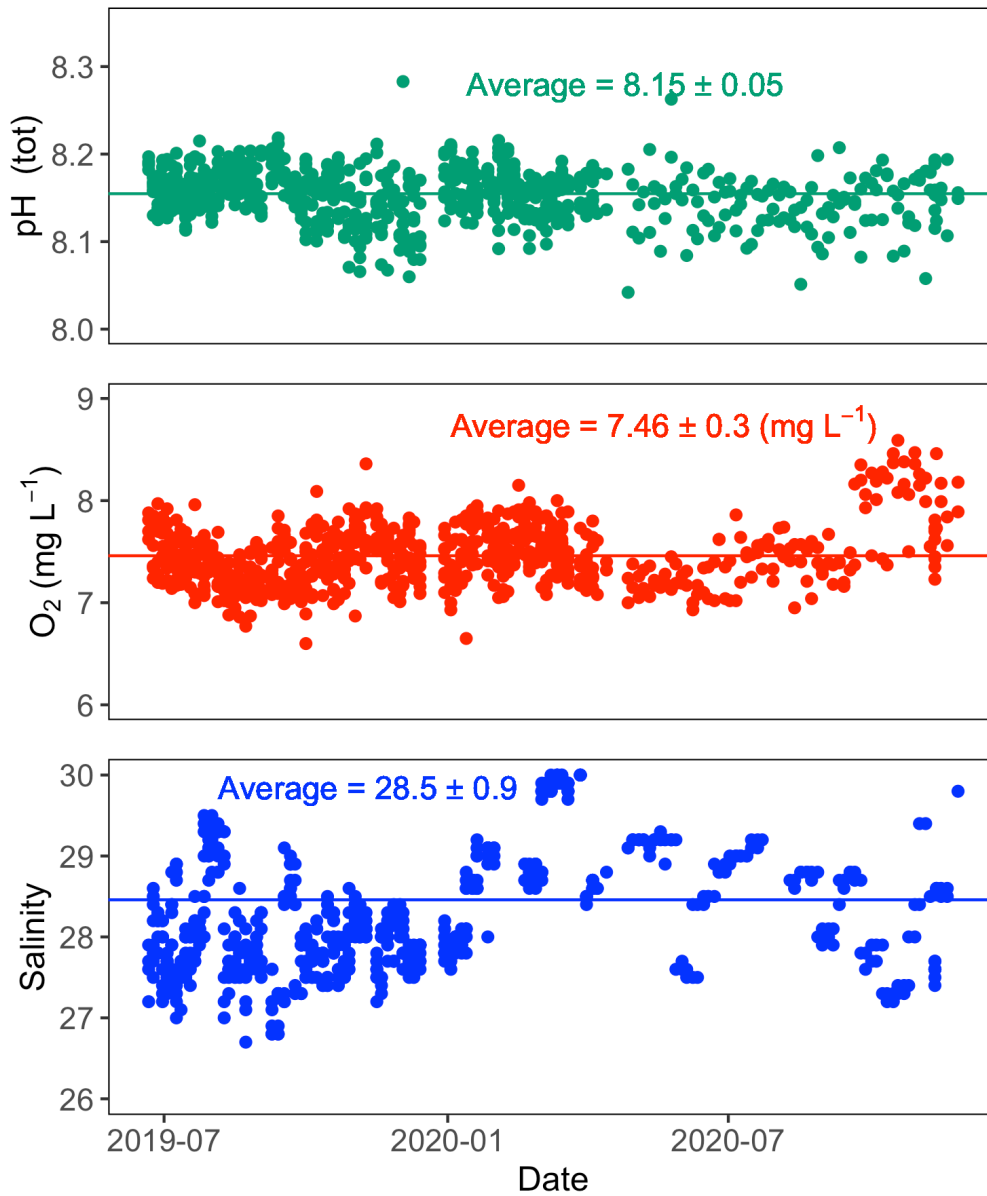

16

17 [Figure S1](#). Measurements (a) of pH, (b) dissolved oxygen, and (c) salinity at bi-weekly water changes for the  
18 span of the feeding experiment. Measurements were taken from both spent and fresh incubation water. Error  
19 on respective means is the standard deviation.

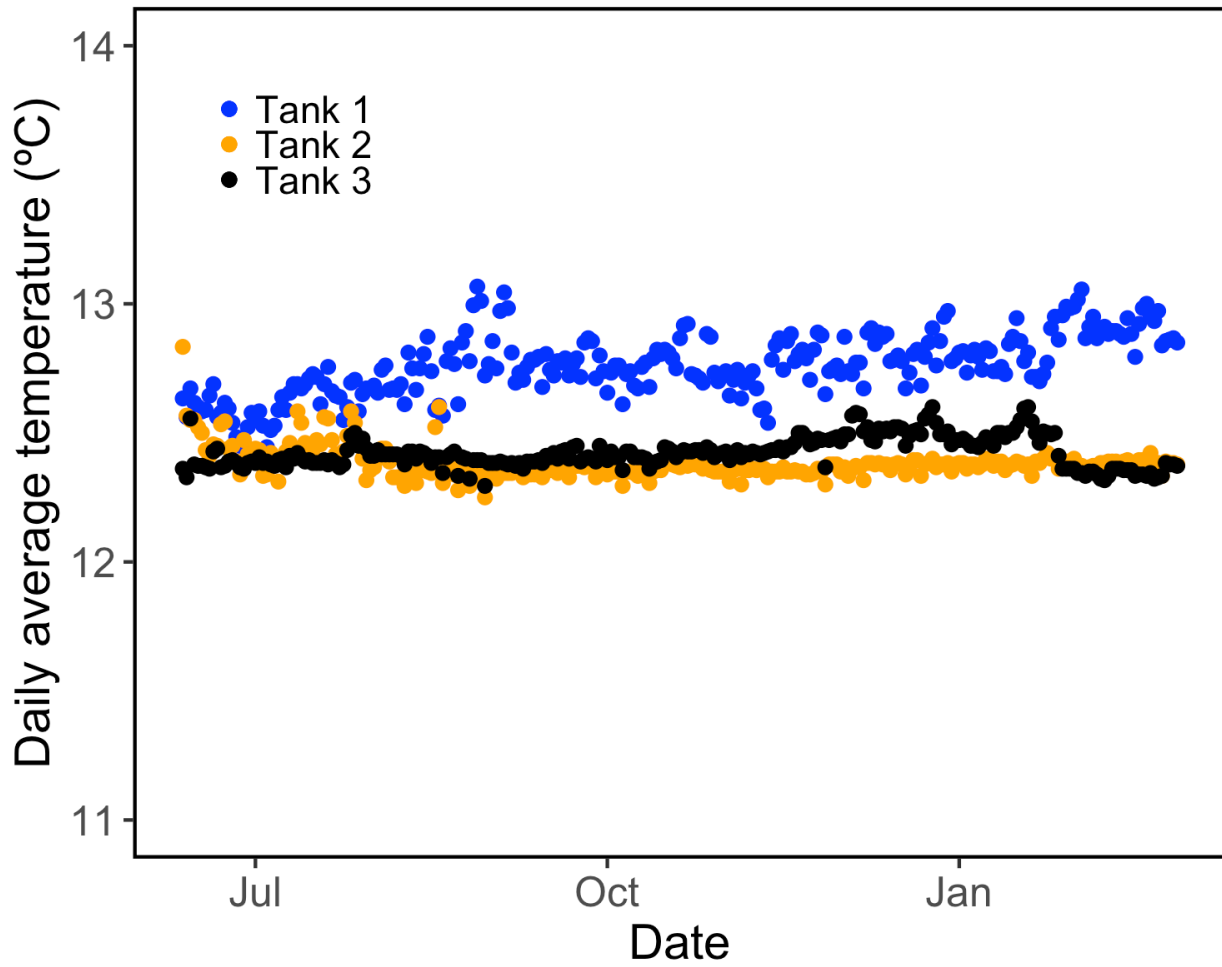

21 [Figure S2](#). Temperature in the three recirculating water tanks over the course of the coral culture experiment.

22 The average temperature among tanks was  $12.5 \pm 0.2^\circ\text{C}$ .

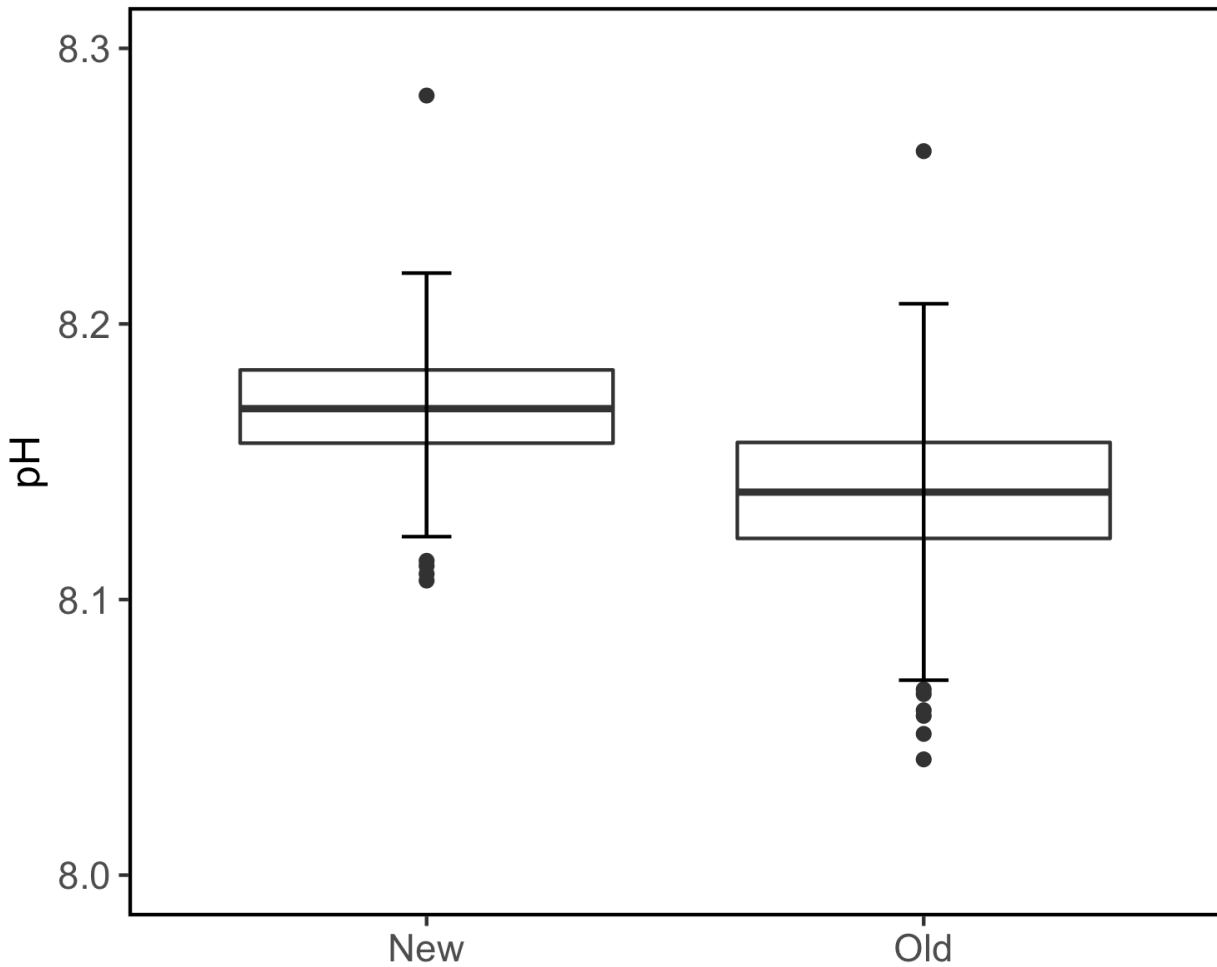

23

24 [Figure S3](#). The pH of seawater prior to and following the coral incubation periods. The seawater was changed  
25 twice a week when the corals were fed in order to maintain relatively constant conditions. After 3 to 4 days,  
26 the pH of the incubation bottle decreased by ~0.03 pH units (p-value < 0.01) due to coral respiration. The  
27 boxplots represent mean, first and third quartiles, and maxima and minima, dots are outliers.

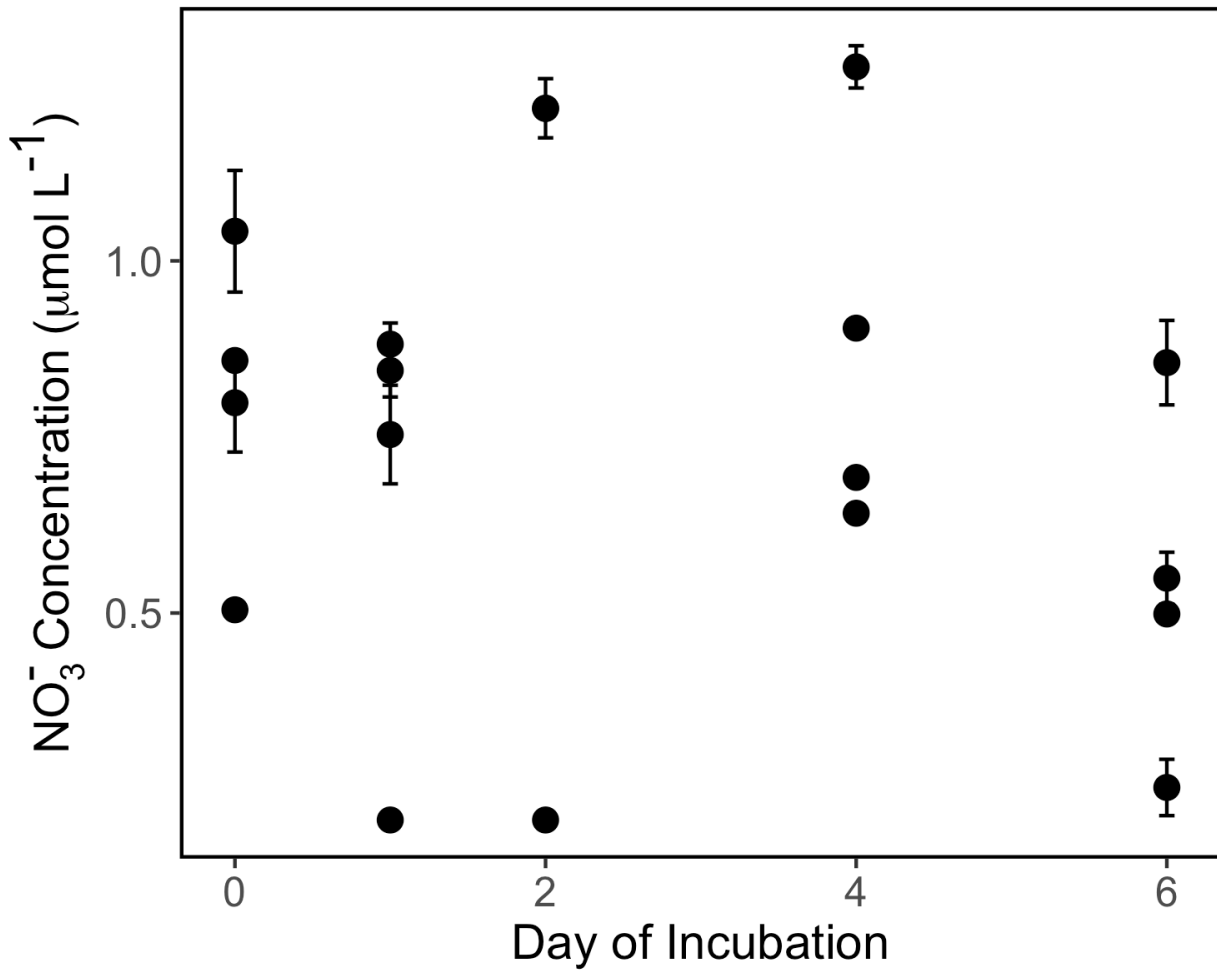

28

29 [Figure S4](#). The concentration of nitrate in the coral incubations over a six-day course.

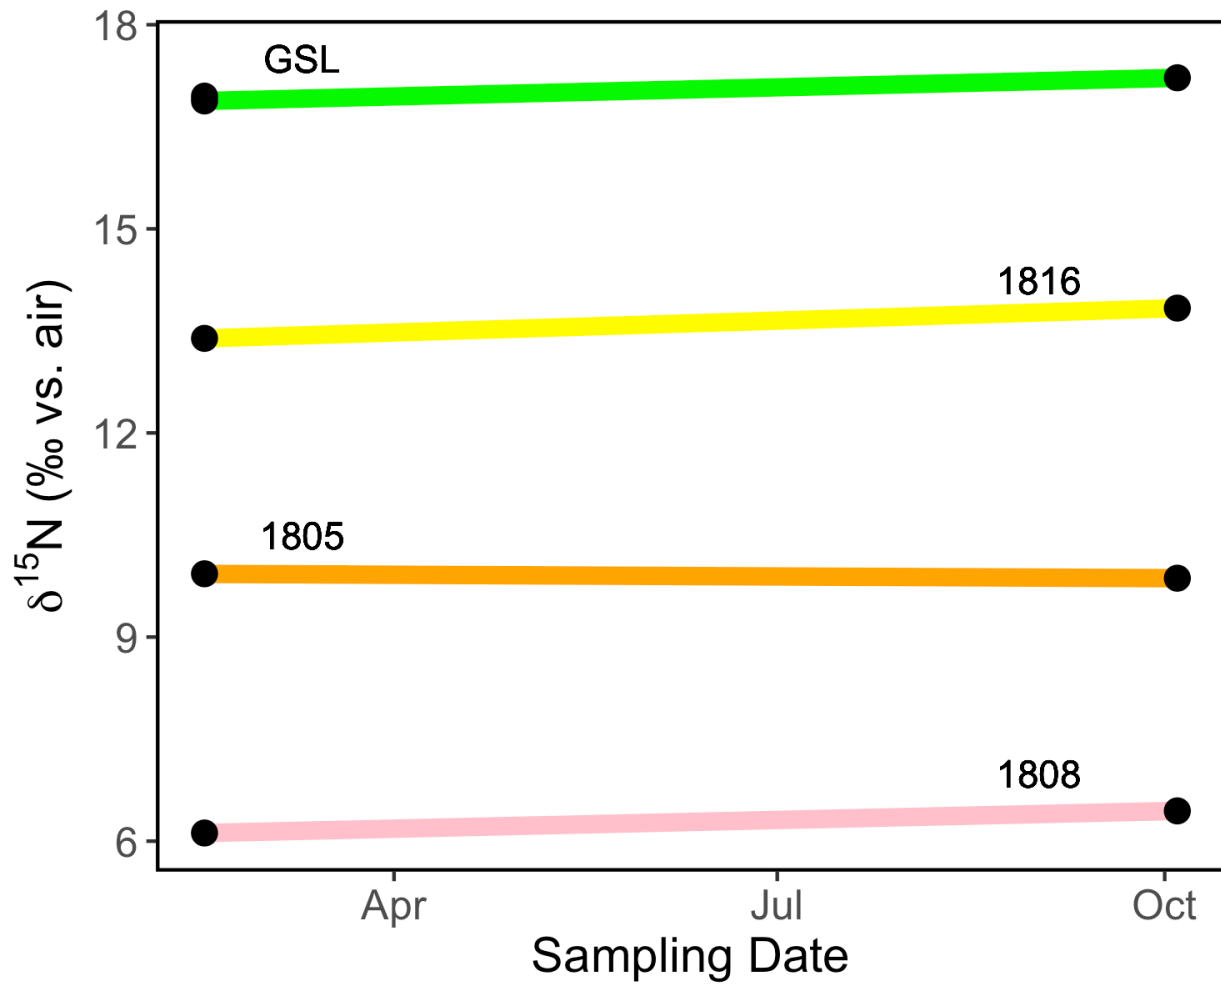

30

31

32 [Figure S5](#). Effect of long-term freezer storage on the  $\delta^{15}\text{N}$  of *Artemia* nauplii. Freezing and time have no

33 significant effect (p-value = 0.93) on the  $\delta^{15}\text{N}$  of the *Artemia* over time for any strain.



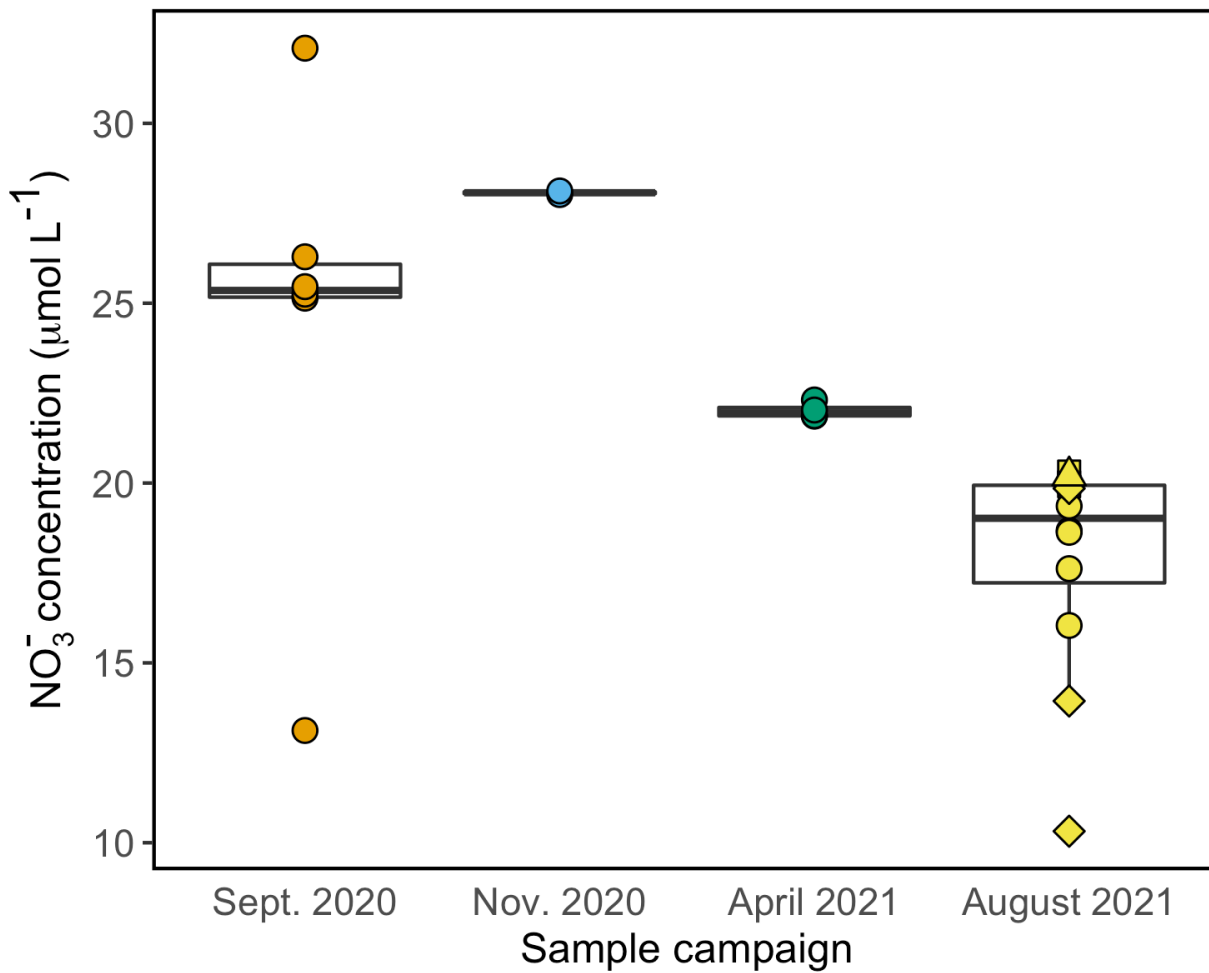

34

35 [Figure S6](#). Boxplot of the concentration of nitrate ( $\text{NO}_3^-$ ) measured in samples collected during respective  
36 sampling campaigns.

37

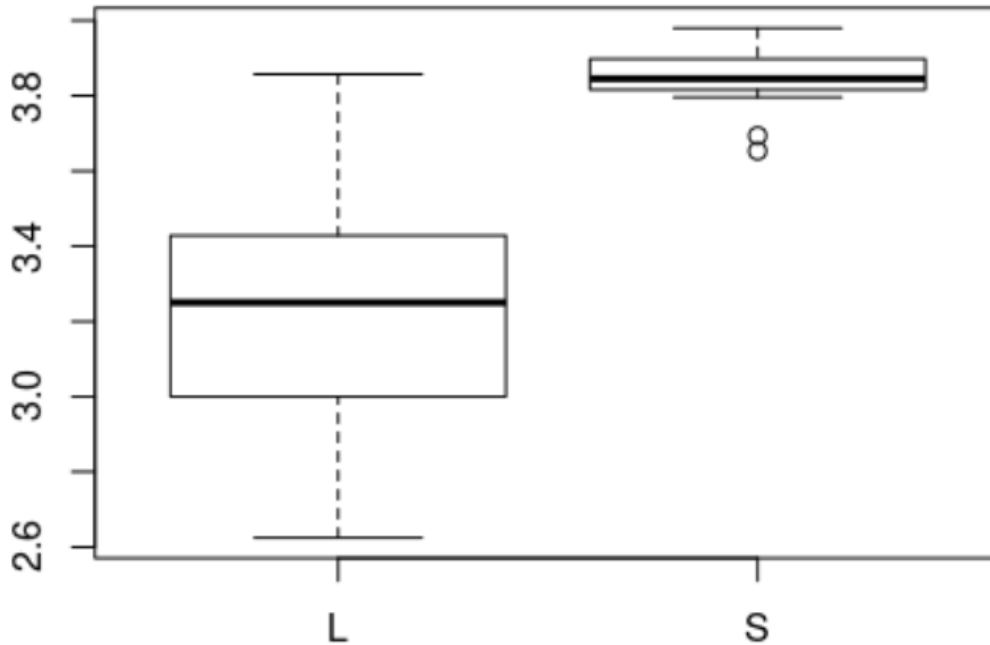

38

39 [Figure S7](#). Boxplot outlining the differences in coral health based on the average feeding rate of coral  
40 between starved (L-batch) and unstarved (S-batch). The starved (L) batch has evidently lower average  
41 feeding (eat) rates than the corals that are not starved. The feeding rate indices are qualitative measures of  
42 health.

43

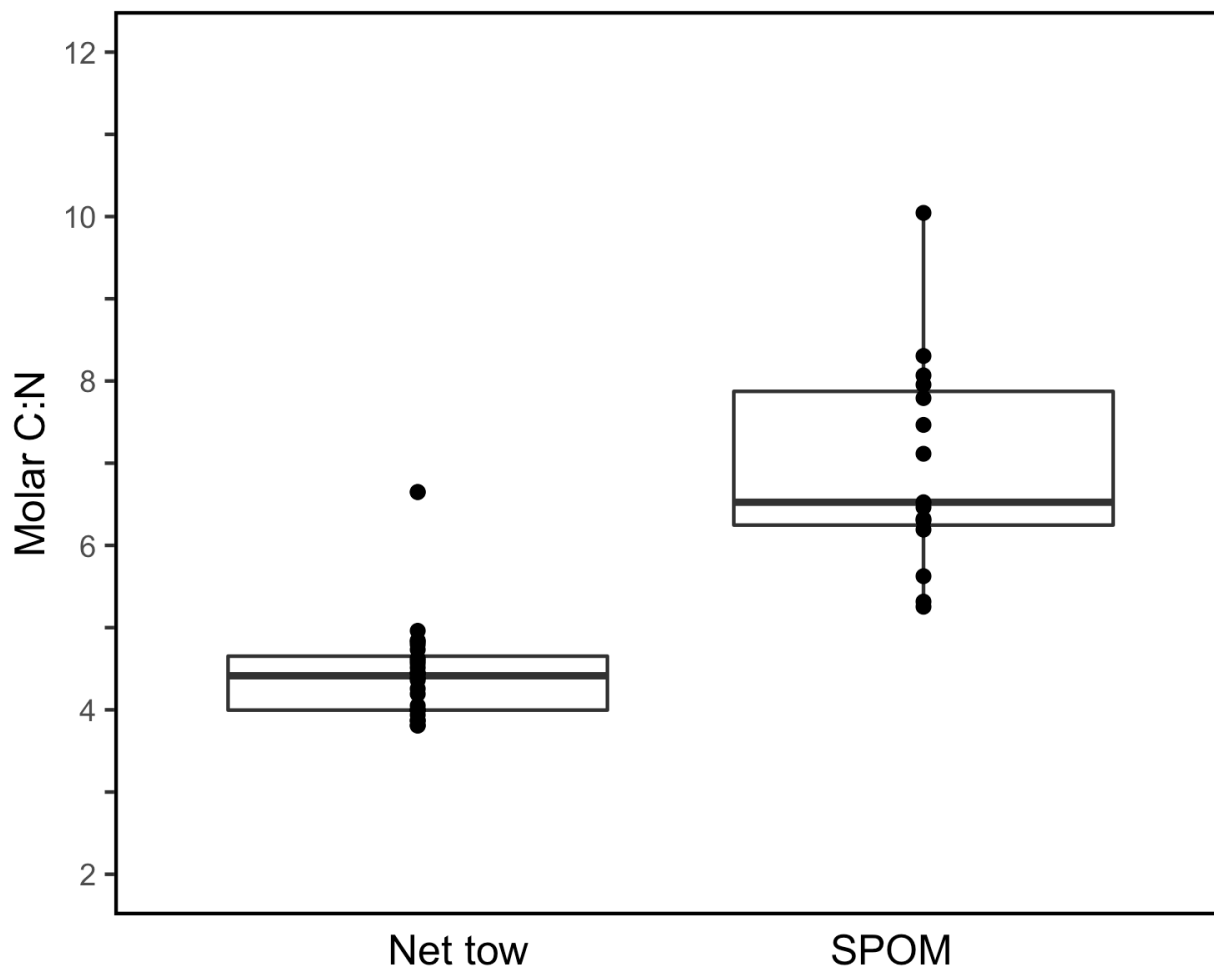

44

45 [Figure S8](#). Boxplots of molar C:N ratio of net tow material (mesh size  $\geq 80\mu\text{m}$ ) and SPOM from the August

46 2021 sampling campaign.

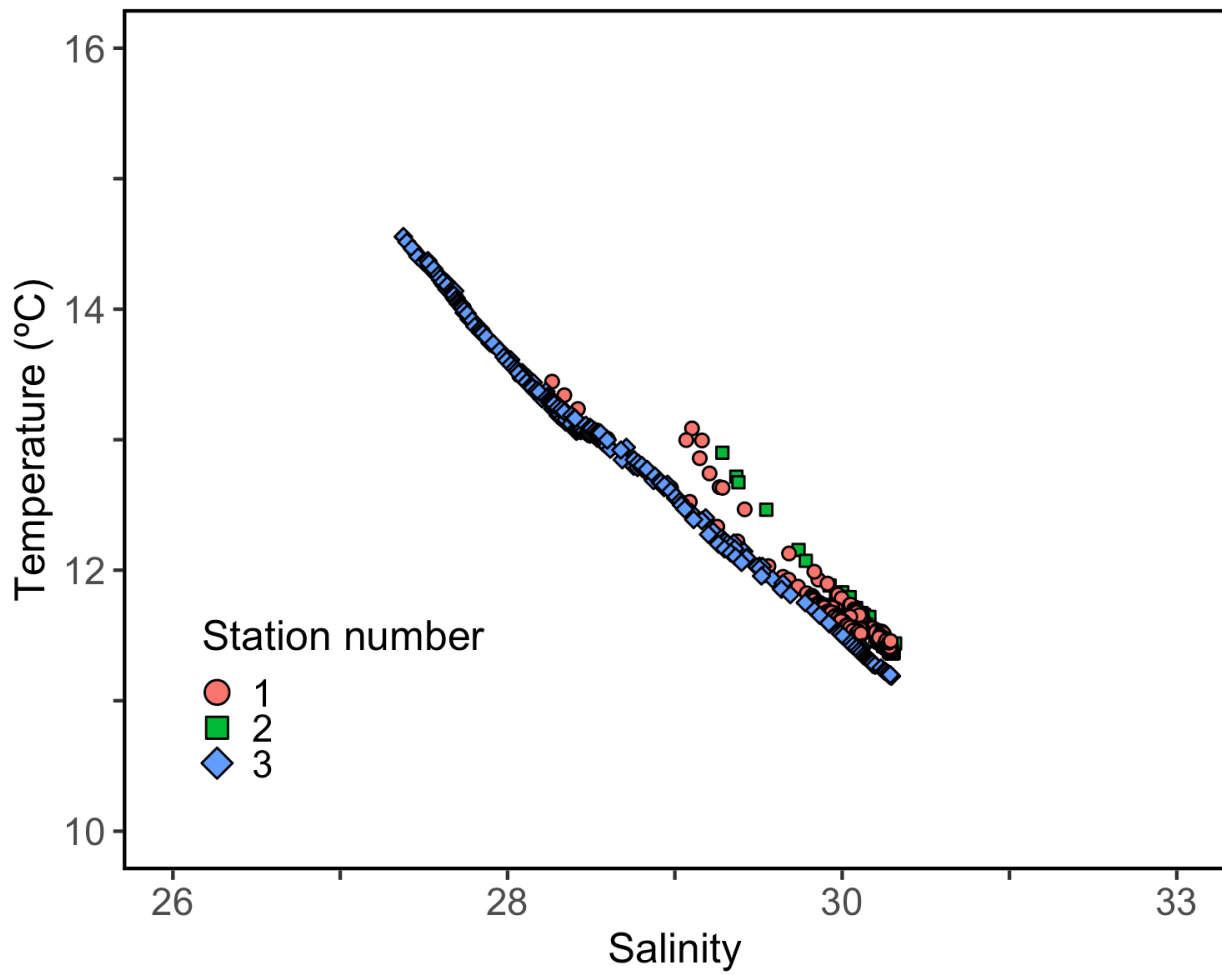

47

48 [Figure S9](#). Temperature versus salinity plot for CTD casts conducted near Friday Harbor in August 2021.

49

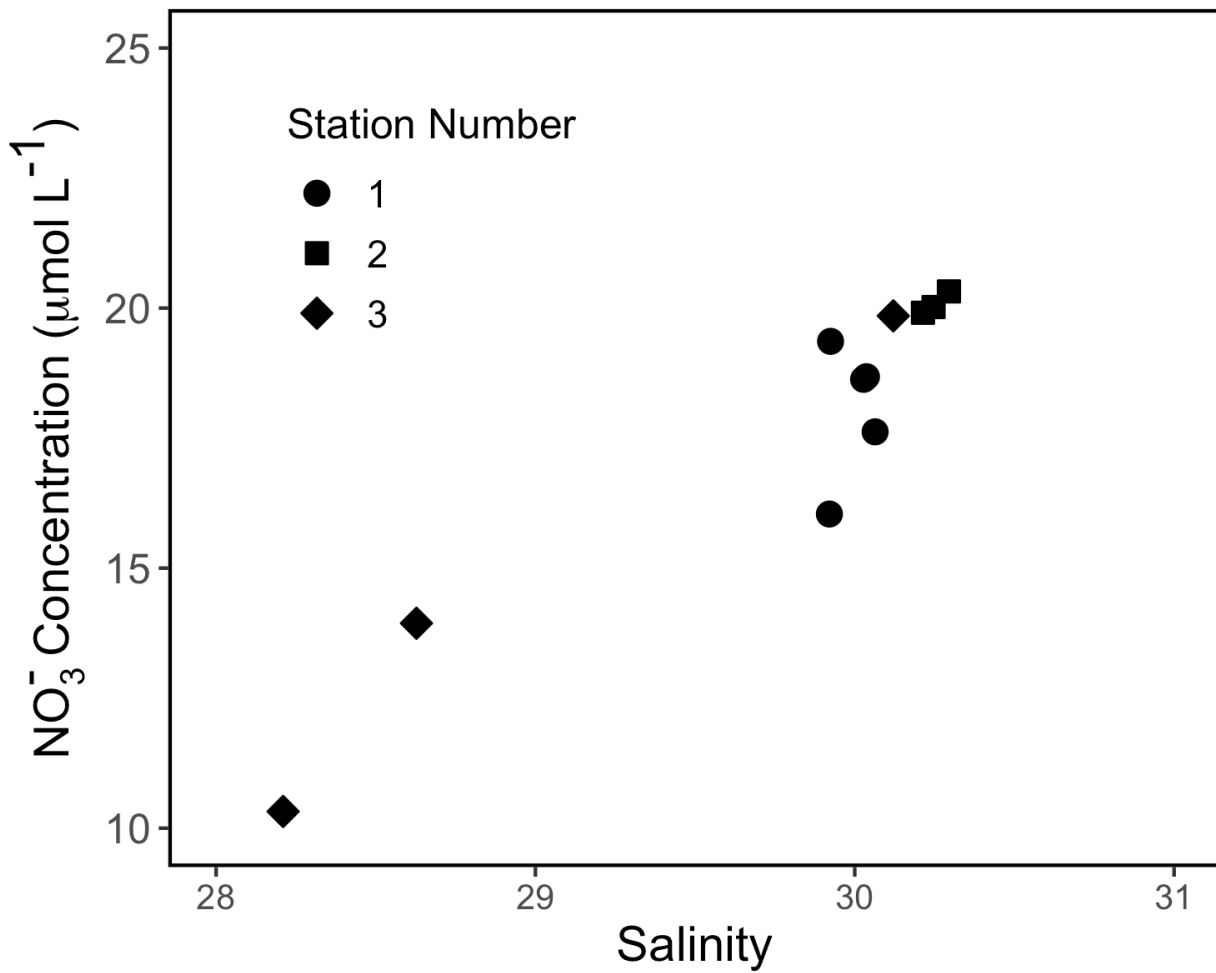

50

51 [Figure S10](#). Salinity and corresponding concentration of nitrate during the August 2021 sampling campaign.

52 There is a correlation between salinity and nitrate concentration (R=0.9, linear regression test in R studio).

53

54
